# Supplementary material
Source: MDPI journal article supplement (https://www.mdpi.com/1424-2818/14/12/1038)
Supplement: s1 [file s1]

Archive with 3 entries (3 files):
- Supplement S1.xls
- Supplement S2.pdf
- Supplement S3.pdf
