# Supplementary material
Source: MDPI journal article supplement (https://www.mdpi.com/1424-2818/14/12/1038)
Supplement: s1 [file s1 › Supplement S1.xls]

## Sheet: Dune
				species
	individuals on tree		Year	Bupalus piniarius L.,	Gilpinia virens Kl.	Microdiprion pallipes Fall.	Dendrolimus pini L.	Semiothisa liturata Сl.
			1979	0.04	0.82	0	0.06	0
			1980	0	0.74	0	0.06	0
			1981	0.06	0.64	0	0.38	0.04
			1982	0	0.02	0	0.02	0
			1983	0	0.1	0	0.04	0
			1984	0.06	0.06	0	0	0
			1985	0.02	0.38	0.04	0	0.02
			1986	0.5	0.04	0.02	0	0.08
			1987	2.66	0.22	0.14	0.1	0.16
			1988	9.44	0.2	0.08	0.08	0.36
			1989	13.5102	0.0408163	0.0408163	0.122449	0.0612245
			1990	13.16	0.08	0.08	0.08	0.04
			1991	6.88	0.28	0.2	0.84	0.08
			1992	0.96	0.92	0.4	2.2	0.32
			1993	0.48	0.64	0	1.08	1.32
			1994	0.44	0.08	0	2.96	0.4
			1995	0.25	0.1	0	0.2	0.2
			1996	0.1	0.2	0	0.2	0.15
			1997	0.05	0.05	0	0	0.05
			1998	0.05	0	0	0	0
			1999	0.2	0	0	0.05	0
			2000	0.1	0.05	0	0	0
			2001	0.1	0.1	0.05	0	0
			2002	0.2	0.4	0	0	0.1
			2003	0.5	0.25	0.1	0	0.3
			2004	0.55	0.45	0.25	0.2	0.35
			2005	0.35	0.1	0.1	0.1	0.65
			2006	0.45	0	0.05	0.85	0.3
			2007	0.35	0.2	0.05	0.95	0.5
			2008	0.25	0	0	1.25	0.05
			2009	0.15	0.1	0.1	0.1	0
			2010	0.55	0.05	0	0.05	0
			2011	0.55	0.15	0.05	0	0
			2012	1.2	0	0.05	0.0666667	0
			2013	0.3	0.15	0	0	0.1
			2014	0.5	0.1	0.15	0.2	0.2
			2015	0.35	0	0	0.1	0.05
			2016	0.05	0	0	0.15	0.1

## Sheet: Top
				species
			Year	Bupalus piniarius L.,	Gilpinia virens Kl.	Microdiprion pallipes Fall.	Dendrolimus pini L.	Semiothisa liturata Сl.
	individuals on tree		1979	0.2	0.64	0	0.04	0
			1980	0	1	0	0.12	0.08
			1981	0	0.16	0	0.28	0.04
			1982	0	0	0	0.04	0
			1983	0.04	0.04	0	0	0
			1984	0	0.04	0	0	0
			1985	0.04	0.44	0	0	0
			1986	0.16	0	0.12	0.04	0
			1987	0.2	0.04	0.24	0.2	0.08
			1988	3	0.2	0.24	0.16	0.08
			1989	10.88	0	0.08	0.12	0.08
			1990	5.4	0	0.04	0.12	0.08
			1991	1.6	0.04	0.28	0.28	0.08
			1992	0.52	0.32	0.6	0.68	0.04
			1993	0.84	0.24	0.04	0.24	0.4
			1994	0.2	0	0	0.68	0
			1995	0	0.05	0	0	0.05
			1996	0	0.1	0	0.05	0.1
			1997	0	0	0	0	0.05
			1998	0	0.05	0.1	0	0
			1999	0	0	0	0	0
			2000	0	0	0.05	0	0
			2001	0	0.15	0.1	0	0
			2002	0.2	0.25	0.05	0	0.05
			2003	0.6	0.35	0.35	0.05	0.15
			2004	0.5	0.6	0.5	0.05	0.55
			2005	0.85	0.15	0.4	0.15	0.45
			2006	0.15	0	0	0.5	0.4
			2007	0.1	0.25	0.2	0.85	0.2
			2008	0.1	0.05	0.15	1.3	0
			2009	0.05	0	0	0.05	0
			2010	0.25	0	0	0	0
			2011	0.35	0.1	0	0	0
			2012	0.65	0	0.05	0	0
			2013	0.3	0.05	0	0.05	0.05
			2014	0.1	0	0.05	0	0.15
			2015	0.1	0.05	0.05	0.05	0.05
			2016	0	0.05	0.15	0.1	0.05

## Sheet: Terrasa
				species
			Year	Bupalus piniarius L.,	Gilpinia virens Kl.	Microdiprion pallipes Fall.	Dendrolimus pini L.	Semiothisa liturata Сl.
	individuals on tree		1979	0	0.12	0	0.1	0
			1980	0	1.08	0	0.16	0.04
			1981	0	1.36	0	0.38	0
			1982	0	0	0	0.02	0
			1983	0	0	0	0.02	0
			1984	0	0	0	0	0.02
			1985	0	0.04	0	0	0
			1986	0.04	0.08	0.08	0	0.1
			1987	0.1	0.04	0.04	0.1	0.02
			1988	0.2	0.02	0.02	0.04	0.04
			1989	0.28	0.02	0	0	0.02
			1990	0.76	0.04	0	0.08	0
			1991	0.52	0.08	0.08	0.44	0.12
			1992	0.28	0.32	0.24	1.72	0.28
			1993	0.64	1.04	0.24	3.08	1.56
			1994	0.04	0.04	0	2.96	0.28
			1995	0.05	0.05	0	0.2	0.2
			1996	0.05	0	0	0	0.15
			1997	0.05	0	0	0	0.1
			1998	0.05	0.05	0.05	0	0.1
			1999	0	0.1	0	0.05	0.05
			2000	0	0.05	0.05	0	0
			2001	0	0.05	0.1	0	0
			2002	0	0.15	0.05	0	0.05
			2003	0.15	0.2	0.15	0.15	0.5
			2004	0.2	0.15	0	0	0.55
			2005	0	0	0.05	0.2	0.7
			2006	0.05	0	0	0.8	0.2
			2007	0.15	0.15	0.15	1.1	0.15
			2008	0.05	0.05	0.1	2	0
			2009	0.1	0.05	0.1	0.15	0.05
			2010	0.1	0.05	0	0.05	0
			2011	0.05	0.05	0	0.05	0
			2012	0.2	0	0	0	0.05
			2013	0	0	0	0.1	0.1
			2014	0.25	0	0	0.3	0.6
			2015	0	0	0.05	0.1	0.35
			2016	0	0	0	0.1	0.05

## Sheet: Lake
				species
			Year	Bupalus piniarius L.,	Gilpinia virens Kl.	Microdiprion pallipes Fall.	Dendrolimus pini L.	Semiothisa liturata Сl.
	individuals on tree		1979	0	0.52	0	0.06	0
			1980	0	2.68	0	0.06	0
			1981	0.02	0.82	0	0.12	0
			1982	0	0	0	0.06	0
			1983	0	0	0	0	0
			1984	0	0.06	0	0	0
			1985	0	0.02	0	0	0
			1986	0.14	0.18	0.04	0.02	0.12
			1987	0.08	0.36	0.16	0.06	0.46
			1988	0.6	0.2	0.125	0.05	0.325
			1989	1.56	0	0.02	0.06	0.16
			1990	0.24	0	0.04	0.16	0.16
			1991	0.2	0.16	0.04	0.12	0.16
			1992	0.16	0.4	0.08	0.04	0.12
			1993	0.04	0.32	0	0.12	0.12
			1994	0	0.04	0	0.08	0.08
			1995	0	0.05	0	0	0.1
			1996	0.05	0.1	0	0	0.1
			1997	0	0.05	0	0	0.05
			1998	0	0.05	0.05	0	0
			1999	0	0	0	0	0
			2000	0	0	0	0	0
			2001	0.05	0	0	0.05	0
			2002	0	0.15	0	0	0.05
			2003	0.25	0.4	0.45	0.05	0.15
			2004	1.05	2.35	2.25	0.2	0.95
			2005	0.35	0.4	0.9	0.2	2.05
			2006	0.05	0.1	0.05	0.65	0.4
			2007	0.15	1.3	0.9	0.4	0.15
			2008	0.05	0.05	0.05	0.2	0
			2009	0	0.05	0.05	0	0
			2010	0.1	0.1	0.05	0	0.05
			2011	0.25	0.15	0.25	0	0
			2012	0.35	0	0	0.05	0
			2013	0.5	0.05	0	0	0.1
			2014	0.2	0.05	0.1	0.2	0.3
			2015	0.4	0.1	0.05	0.25	0.65
			2016	0.1	0.1	0.05	0.05	0.6

## Sheet: Plakor
				species
			Year	Bupalus piniarius L.,	Gilpinia virens Kl.	Microdiprion pallipes Fall.	Dendrolimus pini L.	Semiothisa liturata Сl.
	individuals on tree		1979	0	0	0	0.12	0
			1980	0	0.18	0	0.14	0
			1981	0	0.04	0	0.02	0
			1982	0	0	0	0	0
			1983	0	0	0	0	0
			1984	0	0	0	0	0
			1985	0	0.15	0	0	0
			1986	0.18	0.06	0.02	0.125	0.02
			1987	0.7	0.025	0.175	0.1	0.025
			1988	3.375	0.075	0.025	0.05	0.15
			1989	5.6	0	0.025	0.24	0
			1990	4.04	0	0	0.72	0
			1991	2.64	0.08	0.04	1.2	0.04
			1992	0.88	0.24	0.28	0.4	0.08
			1993	0.32	0.44	0	0.96	0.24
			1994	0.04	0.04	0	0.05	0
			1995	0	0.05	0	0	0.05
			1996	0	0.1	0.05	0	0.05
			1997	0.05	0.05	0	0	0.05
			1998	0.15	0.05	0	0	0
			1999	0.1	0.05	0	0	0
			2000	0.15	0.05	0	0	0
			2001	0.2	0.1	0	0	0
			2002	0.65	0.2	0.1	0.05	0
			2003	1.35	0.3	0.25	0	0.05
			2004	2.65	1.1	0.45	0.05	0.2
			2005	0.55	0.9	0.35	0.15	0.2
			2006	0.2	0	0.05	0.4	0.2
			2007	0.25	0.2	0.25	0.4	0.15
			2008	0	0.1	0.05	0.05	0.05
			2009	0.05	0	0.05	0	0
			2010	0.7	0	0	0	0
			2011	0.1	0.1	0	0.05	0
			2012	0.05	0	0	0.05	0
			2013	0.15	0	0	0.15	0.05
			2014	0.35	0.1	0.15	0.25	0.15
			2015	0.2	0	0	0.05	0.05
			2016	0.1	0	0.05	0	0.1
