# Supplementary material
Source: MDPI journal article supplement (https://www.mdpi.com/1424-2818/14/12/1038)
Supplement: s1 [file s1 › Supplement S2.pdf]

# Supplement 2.

Calculations of autoregressive functions for 25 models of insect population dynamics in five habitats in the Krasnoturansk pine forest

Table S1K2. Values of Equation (2) coefficients and significance of these values for *B. piniarius* in different habitats.

| Top       |             |          |        |         |
|-----------|-------------|----------|--------|---------|
| variables | coefficient | Std.Err. | t(29)  | p-value |
| a0        | -0.420      | 0.131    | -3.196 | 0.003   |
| y(i-2)    | -0.800      | 0.102    | -7.830 | 0.000   |
| y(i-1)    | 1.597       | 0.104    | 15.426 | 0.000   |
| adjR2     | 0.930       |          |        |         |
| F         | 211.000     |          |        |         |
| $\eta$    | 0.09        |          |        |         |
| Placor    |             |          |        |         |
| a0        | -0.378      | 0.144    | -2.618 | 0.014   |
| y(i-2)    | -0.749      | 0.112    | -6.680 | 0.000   |
| y(i-1)    | 1.527       | 0.116    | 13.198 | 0.000   |
| adjR2     | 0.900       |          |        |         |
| F         | 143.800     |          |        |         |
| $\eta$    | 0.12        |          |        |         |
| Lake      |             |          |        |         |
| a0        | -0.607      | 0.221    | -2.751 | 0.010   |
| y(i-2)    | -0.657      | 0.136    | -4.842 | 0.000   |
| y(i-1)    | 1.432       | 0.135    | 10.570 | 0.000   |
| adjR2     | 0.850       |          |        |         |
| F         | 93.400      |          |        |         |
| $\eta$    | 0.16        |          |        |         |
| Terrace   |             |          |        |         |
| a0        | -0.565      | 0.235    | -2.406 | 0.022   |
| y(i-2)    | -0.530      | 0.155    | -3.427 | 0.002   |
| y(i-1)    | 1.339       | 0.159    | 8.410  | 0.000   |
| adjR2     | 0.820       |          |        |         |
| F         | 74.400      |          |        |         |

|        |         |       |        |       |
|--------|---------|-------|--------|-------|
| $\eta$ | 0.19    |       |        |       |
| Dune   |         |       |        |       |
| a0     | -0.186  | 0.084 | -2.209 | 0.035 |
| y(i-2) | -0.799  | 0.100 | -7.986 | 0.000 |
| y(i-1) | 1.640   | 0.104 | 15.821 | 0.000 |
| adjR2  | 0.940   |       |        |       |
| F      | 262.800 |       |        |       |
| $\eta$ | 0.08    |       |        |       |

Table S2K2. Values of Equation (2) coefficients and significance of these values for *S.liturata* in different habitats.

| variables | coefficient | Std.Err. | t(29)  | p-value |
|-----------|-------------|----------|--------|---------|
| Top       |             |          |        |         |
| a0        | -1.069      | 0.246    | -4.348 | 0.000   |
| y(i-2)    | -0.766      | 0.118    | -6.513 | 0.000   |
| y(i-1)    | 1.439       | 0.117    | 12.331 | 0.000   |
| adjR2     | 0.850       |          |        |         |
| F         | 94.700      |          |        |         |
| $\eta$    | 0.13        |          |        |         |
| Plakor    |             |          |        |         |
| a0        | -1.302      | 0.310    | -4.204 | 0.000   |
| y(i-2)    | -0.707      | 0.128    | -5.524 | 0.000   |
| y(i-1)    | 1.340       | 0.127    | 10.540 | 0.000   |
| adjR2     | 0.800       |          |        |         |
| F         | 65.700      |          |        |         |
| $\eta$    | 0.18        |          |        |         |
| Lake      |             |          |        |         |
| a0        | -0.810      | 0.191    | -4.250 | 0.000   |
| y(i-2)    | -0.832      | 0.103    | -8.073 | 0.000   |
| y(i-1)    | 1.536       | 0.103    | 14.877 | 0.000   |
| adjR2     | 0.900       |          |        |         |
| F         | 41.200      |          |        |         |
| $\eta$    | 0.09        |          |        |         |
| Terrace   |             |          |        |         |

|        |         |       |        |       |
|--------|---------|-------|--------|-------|
| a0     | -0.875  | 0.195 | -4.493 | 0.000 |
| y(i-2) | -0.806  | 0.109 | -7.423 | 0.000 |
| y(i-1) | 1.487   | 0.107 | 13.958 | 0.000 |
| adjR2  | 0.880   |       |        |       |
| F      | 125.400 |       |        |       |
| $\eta$ | 0.11    |       |        |       |
| Dune   |         |       |        |       |
| a0     | -0.816  | 0.184 | -4.434 | 0.000 |
| y(i-2) | -0.801  | 0.104 | -7.674 | 0.000 |
| y(i-1) | 1.511   | 0.106 | 14.290 | 0.000 |
| adjR2  | 0.890   |       |        |       |
| F      | 134.300 |       |        |       |
| $\eta$ | 0.11    |       |        |       |

Table S3K2. Values of Equation (2) coefficients and significance of these values for *G. virens* in different habitats.

| Variables | Coefficient | Std.Err. | t(29)  | p-value |
|-----------|-------------|----------|--------|---------|
| Top       |             |          |        |         |
| a0        | -1.463      | 0.491    | -2.982 | 0.006   |
| y(i-4)    | -0.403      | 0.158    | -2.552 | 0.017   |
| y(i-3)    | 0.798       | 0.239    | 3.336  | 0.002   |
| y(i-2)    | -1.126      | 0.247    | -4.549 | 0.000   |
| y(i-1)    | 1.243       | 0.173    | 7.183  | 0.000   |
| adjR2     | 0.620       |          |        |         |
| F         | 13.500      |          |        |         |
| $\eta$    | 0.92        |          |        |         |
| Lake      |             |          |        |         |
| a0        | -1.368      | 0.268    | -5.095 | 0.000   |
| y(i-2)    | -0.657      | 0.116    | -5.658 | 0.000   |
| y(i-1)    | 1.117       | 0.126    | 8.857  | 0.000   |
| adjR2     | 0.700       |          |        |         |
| F         | 39.300      |          |        |         |
| $\eta$    | 0.25        |          |        |         |
| Plakor    |             |          |        |         |

|         |        |       |        |       |
|---------|--------|-------|--------|-------|
| a0      | -1.011 | 0.357 | -2.832 | 0.008 |
| y(i-2)  | -0.426 | 0.166 | -2.570 | 0.015 |
| y(i-1)  | 1.086  | 0.165 | 6.571  | 0.000 |
| adj R2  | 0.620  |       |        |       |
| F       | 28.100 |       |        |       |
| $\eta$  | 0.32   |       |        |       |
| Terrace |        |       |        |       |
| a0      | -1.795 | 0.300 | -5.977 | 0.000 |
| y(i-2)  | -0.684 | 0.113 | -6.039 | 0.000 |
| y(i-1)  | 1.117  | 0.121 | 9.210  | 0.000 |
| adjR2   | 0.715  |       |        |       |
| F       | 42.500 |       |        |       |
| $\eta$  | 0.24   |       |        |       |
| Dune    |        |       |        |       |
| a0      | -1.071 | 0.289 | -3.702 | 0.001 |
| y(i-2)  | -0.565 | 0.147 | -3.844 | 0.001 |
| y(i-1)  | 1.133  | 0.158 | 7.171  | 0.000 |
| adjR2   | 0.615  |       |        |       |
| F       | 27.400 |       |        |       |
| $\eta$  | 0.29   |       |        |       |

Table S4K2. Values of Equation (2) coefficients and significance of these values for *M.pallipes* in different habitats.

| variables  | Coefficient | Std.Err. | t(29)  | p-value |
|------------|-------------|----------|--------|---------|
| Top        |             |          |        |         |
| a0         | -1.099      | 0.313    | -3.508 | 0.002   |
| y(i-4)     | -0.559      | 0.151    | -3.696 | 0.001   |
| y(i-3)     | 1.119       | 0.259    | 4.318  | 0.000   |
| y(i-2)     | -1.480      | 0.258    | -5.733 | 0.000   |
| y(i-1)     | 1.556       | 0.156    | 9.980  | 0.000   |
| adjR2      | 0.810       |          |        |         |
| F          | 33.200      |          |        |         |
| $\eta$ eta | 0.64        |          |        |         |
| Plakor     |             |          |        |         |

|         |        |       |        |       |
|---------|--------|-------|--------|-------|
| a0      | -0.630 | 0.349 | -1.803 | 0.082 |
| y(i-3)  | 0.454  | 0.172 | 2.633  | 0.013 |
| y(i-2)  | -1.195 | 0.265 | -4.501 | 0.000 |
| y(i-1)  | 1.561  | 0.172 | 9.100  | 0.000 |
| adjR2   | 0.800  |       |        |       |
| F       | 43.500 |       |        |       |
| η       | 0.30   |       |        |       |
| Lake    |        |       |        |       |
| a0      | -0.857 | 0.318 | -2.694 | 0.012 |
| y(i-4)  | -0.507 | 0.172 | -2.942 | 0.007 |
| y(i-3)  | 1.169  | 0.306 | 3.824  | 0.001 |
| y(i-2)  | -1.582 | 0.299 | -5.295 | 0.000 |
| y(i-1)  | 1.653  | 0.169 | 9.754  | 0.000 |
| adjR2   | 0.820  |       |        |       |
| F       | 35.500 |       |        |       |
| η       | 0.38   |       |        |       |
| Terrace |        |       |        |       |
| a0      | -1.036 | 0.416 | -2.489 | 0.019 |
| y(i-3)  | 0.469  | 0.158 | 2.962  | 0.006 |
| y(i-2)  | -1.332 | 0.223 | -5.973 | 0.000 |
| y(i-1)  | 1.574  | 0.159 | 9.908  | 0.000 |
| adjR2   | 0.820  |       |        |       |
| F       | 48.200 |       |        |       |
| η       | 0.75   |       |        |       |
| Dune    |        |       |        |       |
| a0      | -0.994 | 0.329 | -3.021 | 0.005 |
| y(i-2)  | -0.527 | 0.154 | -3.411 | 0.002 |
| y(i-1)  | 1.245  | 0.157 | 7.908  | 0.000 |
| adjR2   | 0.750  |       |        |       |
| F       | 47.500 |       |        |       |
| η       | 0.24   |       |        |       |

Table S5K2. Values of Equation (2) coefficients and significance of these values for *D.pini* in different habitats.

| variables | coefficient | Std.Err. | t(29)  | p-value |
|-----------|-------------|----------|--------|---------|
| Top       |             |          |        |         |
| a0        | -0.861      | 0.199    | -4.332 | 0.000   |
| y(i-2)    | -0.794      | 0.110    | -7.188 | 0.000   |
| y(i-1)    | 1.503       | 0.110    | 13.626 | 0.000   |
| adjR2     | 0.880       |          |        |         |
| F         | 125.100     |          |        |         |
| $\eta$    | 0.11        |          |        |         |
| Plakor    |             |          |        |         |
| a0        | -0.847      | 0.215    | -3.945 | 0.000   |
| y(i-2)    | -0.764      | 0.116    | -6.581 | 0.000   |
| y(i-1)    | 1.483       | 0.115    | 12.875 | 0.000   |
| adjR2     | 0.870       |          |        |         |
| F         | 114.8       |          |        |         |
| $\eta$    | 0.12        |          |        |         |
| Lake      |             |          |        |         |
| a0        | -1.012      | 0.247    | -4.104 | 0.000   |
| y(i-2)    | -0.771      | 0.119    | -6.465 | 0.000   |
| y(i-1)    | 1.457       | 0.118    | 12.304 | 0.000   |
| adjR2     | 0.850       |          |        |         |
| F         | 94.800      |          |        |         |
| $\eta$    | 0.13        |          |        |         |
| Terrace   |             |          |        |         |
| a0        | -0.845      | 0.214    | -3.950 | 0.000   |
| y(i-2)    | -0.762      | 0.116    | -6.543 | 0.000   |
| y(i-1)    | 1.443       | 0.116    | 12.394 | 0.000   |
| adjR2     | 0.850       |          |        |         |
| F         | 96.800      |          |        |         |
| $\eta$    | 0.13        |          |        |         |
| Dune      |             |          |        |         |
| a0        | -0.630      | 0.165    | -3.806 | 0.001   |
| y(i-2)    | -0.809      | 0.107    | -7.592 | 0.000   |

|          |       |       |        |       |
|----------|-------|-------|--------|-------|
| $y(i-1)$ | 1.560 | 0.107 | 14.640 | 0.000 |
| adrR2    | 0.900 |       |        |       |
| F        | 156.8 |       |        |       |
| $\eta$   | 0.10  |       |        |       |
